# Supplementary material
Source: PubMed Central journal article supplement (PMC3382560)
Supplement: 1205726109_pnas.201205726SI.pdf [file 1205726109_pnas.201205726SI.pdf]

# Supporting Information

Naseer et al. 10.1073/pnas.1205726109

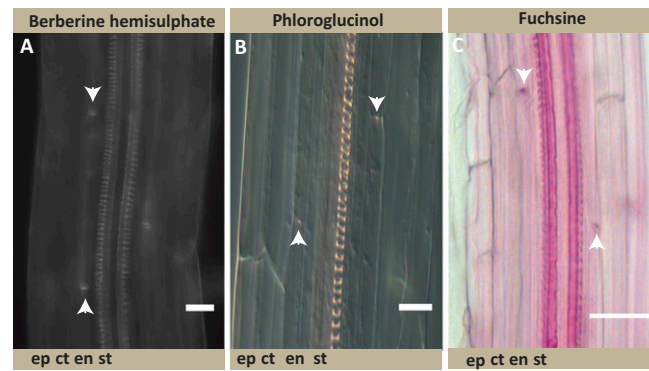

**Fig. S1.** Casparian strip detection with additional dyes. (A) Dot-like appearance of Casparian strips as visualized by Berberine hemisulfate staining. (B) Phloroglucinol staining and (C) Fuchsin staining. Stele (st), endodermis (en), cortex (ct), epidermis (ep).  $n = 16$  (Scale bars: A and B, 20  $\mu\text{m}$ ; C, 50  $\mu\text{m}$ .)

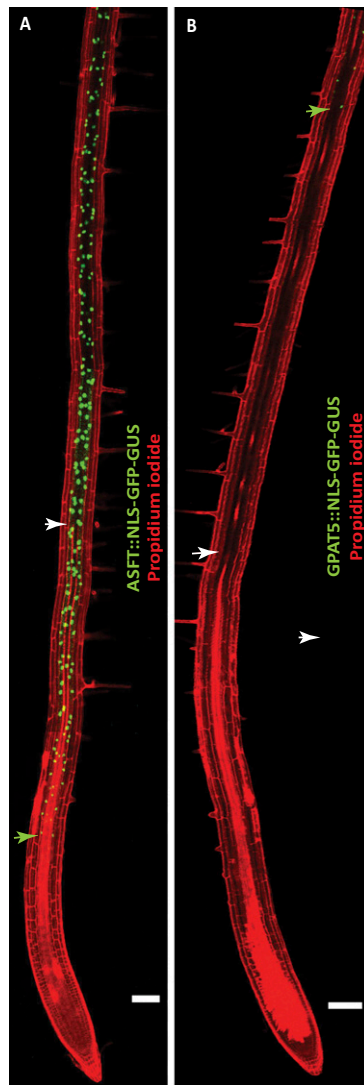

**Fig. S2.** Comparison of onset of ALIPHATIC SUBERIN FERULOYL TRANSFERASE (ASFT) and GPAT5 promoter activities. (A) *ASFT::NLS-GFP-GUS*: beginning of promoter activity in the elongation zone (green arrowhead) before establishment of a functional diffusion barrier, as visualized with propidium iodide (PI, white arrowhead). (B) *GPAT5::NLS-GFP-GUS*: beginning of activity late in the differentiated zone (green arrowhead), appears long after establishment of the diffusion barrier (white arrowhead).  $n = 10$ . (Scale bars, 100  $\mu\text{m}$ .)

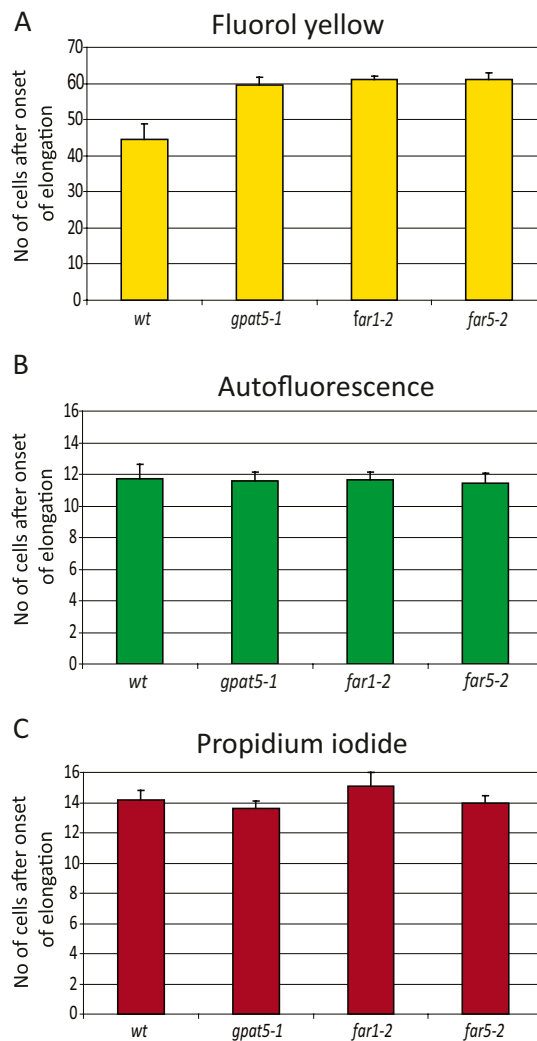

**Fig. S3.** Additional suberin biosynthetic mutants delay in suberin lamellae formation without affecting Casparian strips. (A) Fluorol yellow staining shows the significant delay in the formation of suberin lamellae; first signal was observed at around 44.5 endodermal cells after the onset of elongation in wild-type (*wt*), 59 endodermal cells in *gpat5-1*, 61 endodermal cells in *far1-2*, and 61 endodermal cells in the *far5-2* mutant. (B) Autofluorescence after clearing shows that both both insertion mutants do no significantly affect the appearance of Casparian strips, compared with wild-type. (C) PI staining shows no effect on the establishment of functional diffusion barrier in both insertion mutants and *wt* ( $n = 16$ ). "Onset of elongation" was defined as the zone where an endodermal cells was clearly more than twice its width.





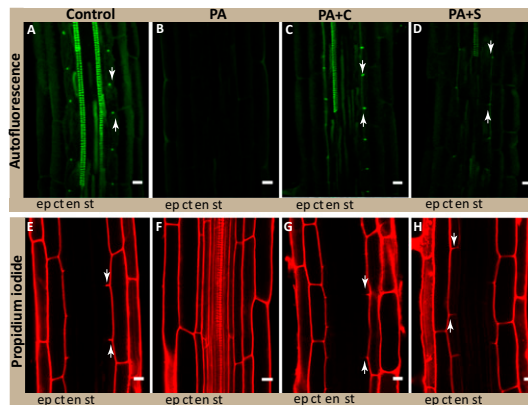

**Fig. S7.** Exogenous treatment with only coniferyl alcohol can lead to Casparian strip formation in lignin inhibitor-treated roots. (A) Autofluorescence after clearing shows the dot-like appearance of Casparian strips in control seedlings. (B) Block of Casparian strip formation in the PA-treated seedling. (C) Formation of functional Casparian strips by exogenous application of 20  $\mu$ M coniferyl alcohol. (D) Formation of Casparian strips by exogenous application of 20  $\mu$ M of sinapyl alcohol. (E) PI staining shows block of PI uptake in untreated (control) seedling. (F) Penetration of PI in the seedling treated with PA. (G) Establishment of functional diffusion barrier because of the complementation of the inhibitor-induced defect with coniferyl-alcohol. (H) Sinapyl-alcohol is less functional in the formation of a functional diffusion barrier than coniferyl alcohol. Stele (st), endodermis (en), cortex (ct), epidermis (ep).  $n = 20$  roots counted. (Scale bars, 20  $\mu$ m.)

**Table S1. Sequences of primers used for genotyping**

| Primer name          | Primer sequence              |
|----------------------|------------------------------|
| <i>horst</i> -1-LP   | AAGAACCAGCTCAAGGCCACC        |
| <i>horst</i> -1-RP   | AGCAAAAAGCCTAAACCGGGA        |
| <i>horst</i> -3-LP   | AGGTAGCAACATCTGCTTCCC        |
| <i>horst</i> -3-RP   | ACCAGGATTTCAAATACGTCG        |
| <i>gpat</i> 5-1-LP   | TTGGTACTATATGCTCCTATTTTGG    |
| <i>gpat</i> 5-1-RP   | TTCGGACAAATGGTGAATTC         |
| <i>far</i> 1-2 -LP   | TTGTTGCAATAAATGAAATGAACAG    |
| <i>far</i> 1-2 -RP   | TACCTTGACGACTATGTCCC         |
| <i>far</i> 5-2-LP    | TTCTTGCAACGTCCTTAGCTG        |
| <i>far</i> 5-2-RP    | AAAGGTGGTATATAAAAATTTCTGTAGC |
| <i>ccr</i> 1- LP     | CCGTAACAATACCAATTCTACAAAAC   |
| <i>ccr</i> 1-RP      | TTTTATTGTTTTGATTGACAATTTGG   |
| <i>f5h</i> 1-LP      | ATGTCGGATTCTCAACTCGTCTGTCA   |
| <i>f5h</i> 1-RP      | GGCTTCAGTTCGTGATGAAGTGGAC    |
| <i>f5h</i> 2-LP      | TATGTGGGAGTCGTGAAATTTATATG   |
| <i>f5h</i> 2-RP      | AACTCACCAAAGAGCTTAGAGAACTC   |
| <i>cad</i> 4-LP      | GCTCAGAACTTGAGCAGTATTGTAAC   |
| <i>cad</i> 4-RP      | TTAACAAATTTGAGTTCAAGTGGAAAG  |
| <i>cad</i> 4-ccc -LP | GCCACCTTGAGTAGGTTTTCC        |
| <i>cad</i> 4-ccc -RP | CTGCAAGAGATCCTTCTGGTG        |
| <i>cad</i> 5-LP      | AATACACACACATAAACAGCAAAGC    |
| <i>cad</i> 5-RP      | CTCTCTTCTGTTTGATGAGCTTATG    |
| <i>cad</i> 5-ccc -LP | GATCTTGCAATGCCTCTTCTC        |
| <i>cad</i> 5-ccc -RP | GAAGTAGTGGAGGTGGGATCA        |
| LBb1                 | ATTTTGCCGATTTTCGGAAC         |
| GABI-LB              | ATATTGACCATCATACTCATTGC      |
| Versailles-LB        | CTACAAATTGCCTTTTCTTATCGAC    |

**Table S2. Details of knock-out mutants associated with suberin biosynthesis**

| Gene number | Accession | Salk number           | Mutant name    | References          |
|-------------|-----------|-----------------------|----------------|---------------------|
| AT5G58860   | Col       | SALK_107454           | <i>horst-1</i> | Hofer et al. (1)    |
| AT5G58860   | Col       | SALK_050126.55.50.x   | <i>horst-3</i> | Present work        |
| AT3G11430   | Col       | SALK_018117           | <i>gpats-1</i> | Beisson et al. (2)  |
| At5g22500   | Col       | SALK_149469           | <i>far 1-2</i> | Domergue et al. (3) |
| At3g44550   | Col       | SALK_070363           | <i>far 5-2</i> | Domergue et al. (3) |
| At1g15950   | Col       | GABI_622C01           | <i>ccr1</i>    | Ruel et al. (4)     |
| At4g36220   | Col       | SALK_063792           | <i>f5h-1</i>   | Huang et al. (5)    |
| At5g04330   | Col       | SALK_093419           | <i>f5h-2</i>   | Present work        |
| At3g19450   | Col       | SAIL_1265_A06         | <i>cad4-c</i>  | Present work        |
| At3g19450   | Ws        | Versailles collection | <i>cad4-c</i>  | Sibout et al. (6)   |
| At4g34230   | Col       | SALK_040062           | <i>cad5-d</i>  | Kim et al. (7)      |
| At4g34230   | Ws        | Versailles collection | <i>cad5-d</i>  | Sibout et al. (6)   |

- Hofer R, et al. (2008) The Arabidopsis cytochrome P450 CYP86A1 encodes a fatty acid omega-hydroxylase involved in suberin monomer biosynthesis. *J Exp Bot* 59(9):2347–2360.
- Beisson F, Li Y, Bonaventure G, Pollard M, Ohlrogge JB (2007) The acyltransferase GPAT5 is required for the synthesis of suberin in seed coat and root of Arabidopsis. *Plant Cell* 19(1): 351–368.
- Domergue F, et al. (2010) Three Arabidopsis fatty acyl-coenzyme A reductases, FAR1, FAR4, and FAR5, generate primary fatty alcohols associated with suberin deposition. *Plant Physiol* 153(4):1539–1554.
- Ruel K, et al. (2009) Impact of CCR1 silencing on the assembly of lignified secondary walls in Arabidopsis thaliana. *New Phytol* 184(1):99–113.
- Huang J, et al. (2009) Pleiotropic changes in Arabidopsis f5h and sct mutants revealed by large-scale gene expression and metabolite analysis. *Planta* 230(5):1057–1069.
- Sibout R, et al. (2003) Expression pattern of two paralogs encoding cinnamyl alcohol dehydrogenases in Arabidopsis. Isolation and characterization of the corresponding mutants. *Plant Physiol* 132(2):848–860.
- Kim SJ, et al. (2004) Functional reclassification of the putative cinnamyl alcohol dehydrogenase multigene family in Arabidopsis. *Proc Natl Acad Sci USA* 101(6):1455–1460.

**Table S3. Primer sequences used for construction of promoter::GUS fusions**

| At number | Gene name       | Enzyme name                              | Bp before ATG | Primer name                                                   | Primer sequence                                                                             |
|-----------|-----------------|------------------------------------------|---------------|---------------------------------------------------------------|---------------------------------------------------------------------------------------------|
| at1g04220 | <i>DAISY</i>    | 3-ketoacyl CoA synthase                  | 2,084 bp      | prKCS2-attB4(12bp)<br>Sense<br>prKCS2-attB1r(12bp) AS         | ATAGAAAAGTTGCTCTCATGGTTG<br>AGTAGTTGAATGTTG<br>TTGTACAAACTTGCGGTAGGTTTT<br>TTGGTTTTAAATGATA |
| at1g67730 | <i>KCR1</i>     | Ketoacyl CoA reductase                   | 2,027 bp      | prKCR1-attB4(12bp)<br>Sense<br>prKCR1-attB1r(12bp) AS         | ATAGAAAAGTTGCTCAAATGTGC<br>AGGTTGCTCTATTAT<br>TTGTACAAACTTGCTAGAGAAGAA<br>AGGTTGAGACTTTGG   |
| at5g58860 | <i>HORST</i>    | Fatty acid $\omega$ -hydroxylase         | 2,165 bp      | prHORST-attB4(12bp)<br>Sense<br>prHORST-attB1r(12bp) AS       | ATAGAAAAGTTGCTGAGTAGTACC<br>CTCAGAGGAACTTGCA<br>TTGTACAAACTTGCTATCCCGGTTT<br>AGGCTTTTTGCT   |
| at5g23190 | <i>CYP86B1</i>  | Fatty acid $\omega$ -hydroxylase         | 1,734 bp      | prCYP86B1-attB4(12bp)<br>Sense<br>prCYP86B1-attB1r(12bp) AS   | ATAGAAAAGTTGCTCACACCCAGTA<br>AGAGATCAAACACA<br>TTGTACAAACTTGCTGACAAAGA<br>GAAGAGAGAGCGA     |
| at4g15330 | <i>CYP705A1</i> | Other CYP450 enzymes                     | 1,917 bp      | prCYP705A1-attB4(12bp)<br>Sense<br>prCYP705A1-attB1r(12bp) AS | ATAGAAAAGTTGCTTTCATCGTGCTG<br>CCAAAGTAGTGA<br>TTGTACAAACTTGCTGTTGCTGAAA<br>AGCAAAGAAGAGGC   |
| at3g11430 | <i>GPAT5</i>    | Glycerol-acyl-transferase                | 2,146 bp      | prGPAT5-attB4(12bp)<br>Sense<br>prGPAT5-attB1r(12bp) AS       | ATAGAAAAGTTGCTTGATCGCAA<br>ACGTCAATGGTCTAT<br>TTGTACAAACTTGCTCTTTTGT<br>TTTGCTCGAATATTA     |
| at5g41040 | <i>ASFT</i>     | Feruloyl-acyl-transferase                | 2,049 bp      | prACT-attB4(12bp) Sense<br>prACT-attB1r(12bp) AS              | ATAGAAAAGTTGCTGAAGATCAG<br>CAGCAGAGTGCAGAG<br>TTGTACAAACTTGCTTTGATCCAAA<br>TGGAGAAAACAGC    |
| at3g44540 | <i>FAR4</i>     | Alcohol-forming fatty acyl-CoA reductase | 2,300 bp      | prFAR4-attB4(12bp) Sense<br>prFAR4-attB1r(12bp) AS            | ATAGAAAAGTTGCTGGAACCTAT<br>GTCCGAACCTCCG<br>TTGTACAAACTTGCTGAAGAAA<br>CTTATATCTATCCAATTAAT  |

For construction of transgenic line expressing CDEF1 (At4g30140), Gateway Directional TOPOentry vector(U15010) was used (Invitrogen). Fragments of entry clones were transferred into the destination vector pB7m34GW.
